# Supplementary material
Source: publisher figshare collection journal article supplement (https://acs.figshare.com/ndownloader/files/4041142)
Supplement: Supplementary file 1 [file 4041142]

# **Robustness of Ru/SiO<sub>2</sub> as a Hydrogen-Evolution Catalyst in a Photocatalytic System Using an Organic Photocatalyst**

*Yusuke Yamada,<sup>†</sup> Shinya Shikano,<sup>†</sup> and Shunichi Fukuzumi<sup>\*,†,‡</sup>*

<sup>†</sup> Department of Material and Life Science, Graduate School of Engineering, Osaka University, ALCA,  
Japan Science and Technology Agency (JST), Suita, Osaka 565-0871, Japan,

<sup>‡</sup> Department of Bioinspired Science, Ewha Womans University, Seoul 120-750, Korea

**RECEIVED DATE (to be automatically inserted after your manuscript is accepted if required according to the journal that you are submitting your paper to)**

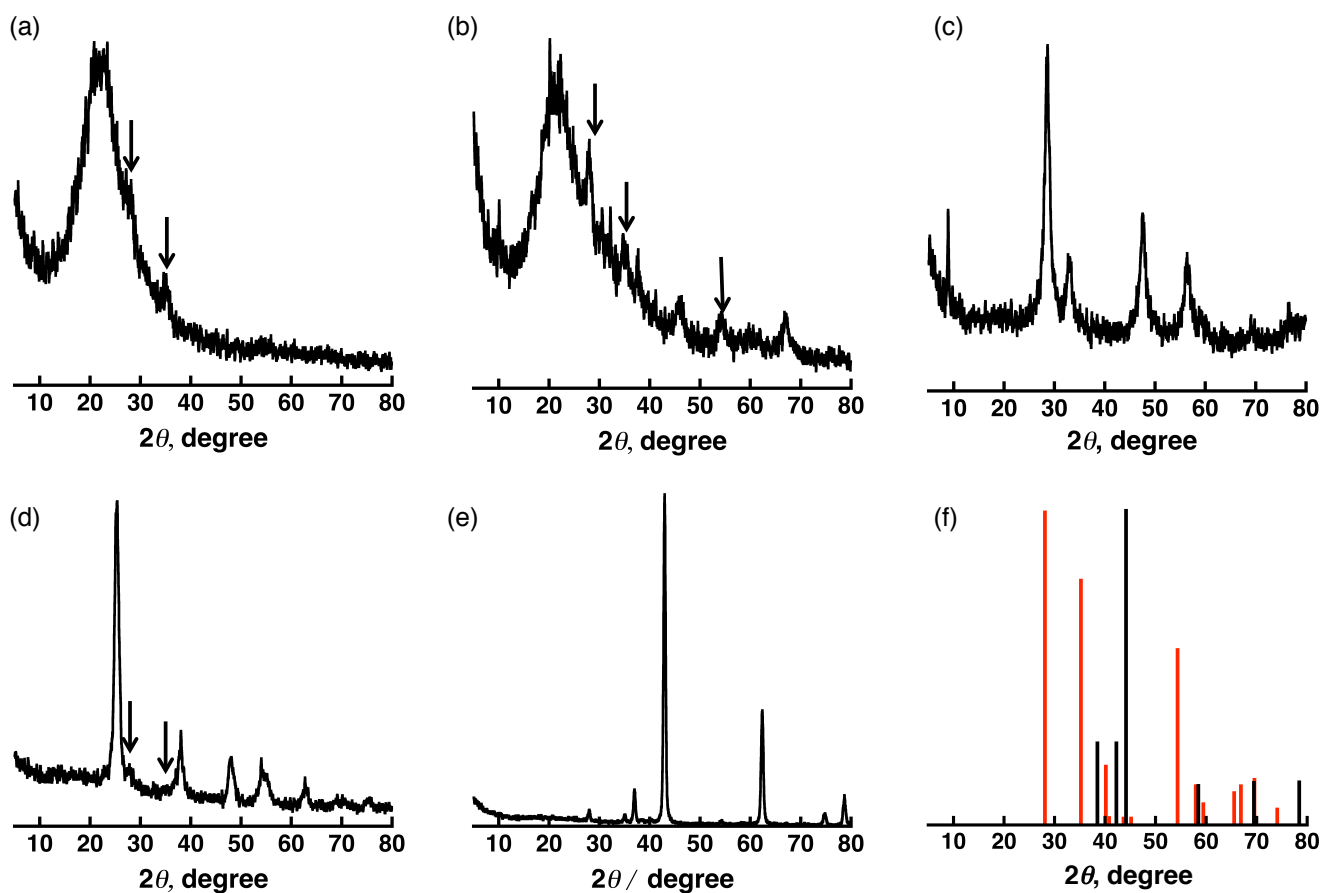

**Figure S1.** X-ray diffraction patterns of (a) Ru/SiO<sub>2</sub>, (b) Ru/SiO<sub>2</sub>-Al<sub>2</sub>O<sub>3</sub>, (c) Ru/CeO<sub>2</sub>, (d) Ru/TiO<sub>2</sub>, (e) Ru/MgO and (f) RuO<sub>2</sub> (red) and Ru metal (black) reported in literature. Arrows indicate the positions of diffraction peaks of RuO<sub>2</sub>.

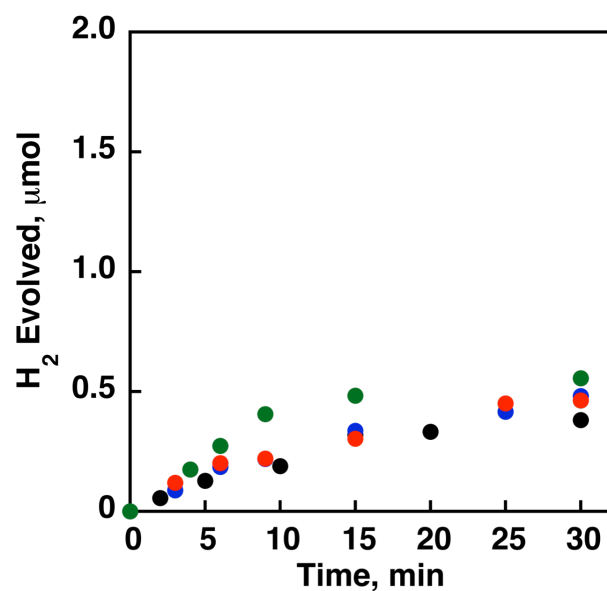

**Figure S2.** Comparison of time courses of the photocatalytic hydrogen evolution using Pt/SiO<sub>2</sub> with different Pt loading amounts (1 wt%, black; 2 wt%, blue; 3 wt%, red and 4 wt%, green).

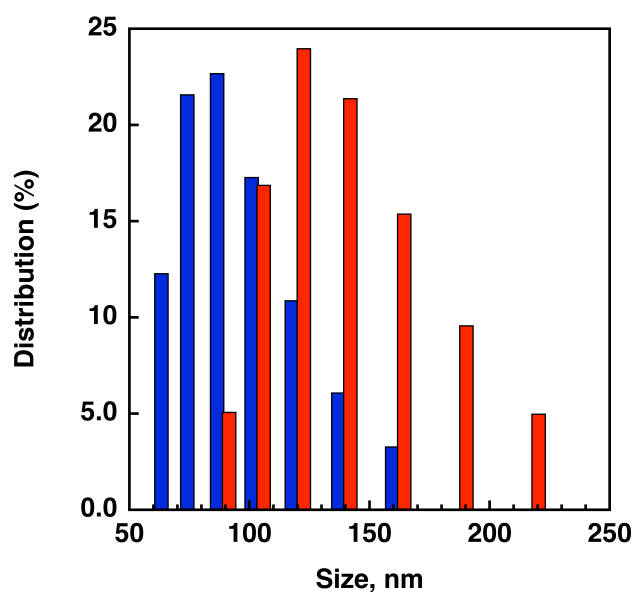

**Figure S3.** Size distribution of spherical SiO<sub>2</sub> (s-SiO<sub>2</sub>) (blue) and 1.1 wt% Ru/s-SiO<sub>2</sub> (red) determined by dynamic laser scattering (DLS).

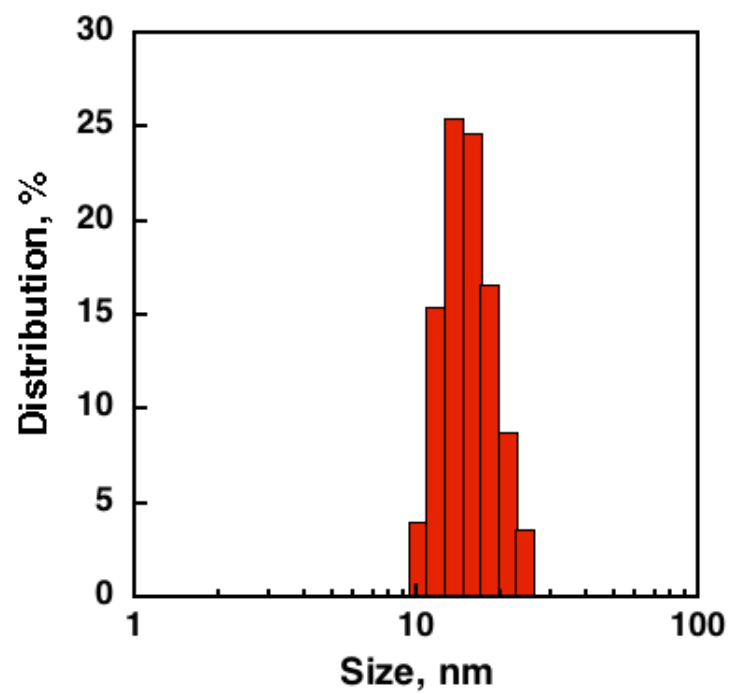

**Figure S4.** Size distribution of PtNPs after the photocatalytic reactions determined by dynamic laser scattering (DLS).
